# Supplementary material
Source: PubMed Central journal article supplement (PMC4170782)
Supplement: NIHMS60240-supplement-Web_appendices.pdf [file NIHMS60240-supplement-Web_appendices.pdf]

**Webtable 1a: Age and smoking (current vs. not current) adjusted hazard ratios (HR) with 95% confidence intervals (CI) for cancer mortality (selected sites) before and after additional adjustment for drinking status (not current vs. current alcohol intake) in participants with complete data on covariates (smoking  $n = 377\ 527$ ; smoking and drinking  $n = 365\ 557$ ; data left censored at 3 years) in the Asia Pacific Cohort Studies Collaboration. Models stratified by study and sex.**

| Cancer site        | Covariates** |             | Body mass index (kg/m <sup>2</sup> ) |                   |                   |                   | Trend $\geq 18.5$ (kg/m <sup>2</sup> ) |             |
|--------------------|--------------|-------------|--------------------------------------|-------------------|-------------------|-------------------|----------------------------------------|-------------|
|                    |              |             | 12.0-18.4                            | 18.5-24.9         | 25.0-29.9         | 30.0-60.0         | Per 5 units                            | $P_{trend}$ |
| All Cancer*        | SMK          | Events      | 176                                  | 1971              | 1130              | 364               |                                        |             |
|                    |              | HR (95% CI) | 1.12 (0.96, 1.31)                    | 1.00 (0.96, 1.05) | 1.07 (1.01, 1.14) | 1.22 (1.09, 1.36) | 1.09 (1.04, 1.14)                      | 0.002       |
|                    | SMK, ALC     | Events      | 159                                  | 1730              | 1023              | 347               |                                        |             |
|                    |              | HR (95% CI) | 1.16 (0.98, 1.37)                    | 1.00 (0.95, 1.05) | 1.08 (1.02, 1.16) | 1.23 (1.10, 1.38) | 1.09 (1.04, 1.15)                      | 0.001       |
| UADT               | SMK          | Events      | 18                                   | 166               | 53                | 12                |                                        |             |
|                    |              | HR (95% CI) | 1.00 (0.61, 1.66)                    | 1.00 (0.85, 1.18) | 0.71 (0.54, 0.94) | 0.68 (0.38, 1.23) | 0.77 (0.61, 0.97)                      | 0.06        |
|                    | SMK, ALC     | Events      | 18                                   | 156               | 50                | 12                |                                        |             |
|                    |              | HR (95% CI) | 1.10 (0.66, 1.82)                    | 1.00 (0.85, 1.18) | 0.68 (0.51, 0.91) | 0.67 (0.37, 1.22) | 0.76 (0.60, 0.96)                      | 0.047       |
| Oesophagus         | SMK          | Events      | 14                                   | 98                | 29                | 7                 |                                        |             |
|                    |              | HR (95% CI) | 1.17 (0.66, 2.08)                    | 1.00 (0.81, 1.24) | 0.76 (0.52, 1.10) | 0.79 (0.36, 1.71) | 0.85 (0.64, 1.15)                      | 0.30        |
|                    | SMK, ALC     | Events      | 14                                   | 94                | 26                | 7                 |                                        |             |
|                    |              | HR (95% CI) | 1.24 (0.70, 2.21)                    | 1.00 (0.81, 1.24) | 0.69 (0.46, 1.02) | 0.77 (0.36, 1.69) | 0.82 (0.61, 1.12)                      | 0.21        |
| Oropharynx, larynx | SMK          | Events      | 4                                    | 68                | 24                | 5                 |                                        |             |
|                    |              | HR (95% CI) | 0.68 (0.24, 1.89)                    | 1.00 (0.78, 1.28) | 0.65 (0.43, 0.98) | 0.56 (0.23, 1.41) | 0.66 (0.46, 0.95)                      | 0.09        |

| Cancer site | Covariates** | Body mass index (kg/m <sup>2</sup> ) |                   |                   |                   | Trend ≥ 18.5 (kg/m <sup>2</sup> ) |                           |       |
|-------------|--------------|--------------------------------------|-------------------|-------------------|-------------------|-----------------------------------|---------------------------|-------|
|             |              | 12.0-18.4                            | 18.5-24.9         | 25.0-29.9         | 30.0-60.0         | Per 5 units                       | <i>P</i> <sub>trend</sub> |       |
| Lung        | SMK, ALC     | Events                               | 4                 | 62                | 24                | 5                                 |                           |       |
|             |              | HR (95% CI)                          | 0.78 (0.28, 2.20) | 1.00 (0.77, 1.29) | 0.68 (0.45, 1.03) | 0.57 (0.23, 1.42)                 | 0.67 (0.47, 0.97)         | 0.12  |
|             | SMK          | Events                               | 71                | 544               | 192               | 64                                |                           |       |
|             |              | HR (95% CI)                          | 1.13 (0.88, 1.47) | 1.00 (0.92, 1.09) | 0.69 (0.60, 0.80) | 0.85 (0.65, 1.10)                 | 0.86 (0.77, 0.97)         | 0.006 |
| SMK, ALC    | Events       | 68                                   | 527               | 177               | 63                |                                   |                           |       |
|             | HR (95% CI)  | 1.10 (0.84, 1.43)                    | 1.00 (0.92, 1.09) | 0.66 (0.57, 0.77) | 0.83 (0.64, 1.08) | 0.86 (0.76, 0.96)                 | 0.003                     |       |

\*All cancers after excluding lung and upper aero-digestive tract cancers. \*\*In addition to age: SMK = smoking and ALC = drinking status

**Webtable 1b: Age adjusted hazard ratios (HR) with 95% confidence intervals (CI) for cancer mortality (selected sites) according to body mass index in never smokers (NEVER SMK,  $n = 172\ 268$ ) compared to ever, ex, or current smokers (SMOKER,  $n = 168\ 228$ ) after left censoring at 3 years in the Asia Pacific Cohort Studies Collaboration. Models stratified by study and sex.**

| Cancer site        | Smoking   |             | Body mass index (kg/m <sup>2</sup> ) |                   |                   |                   | Trend $\geq 18.5$ (kg/m <sup>2</sup> ) |             |             |
|--------------------|-----------|-------------|--------------------------------------|-------------------|-------------------|-------------------|----------------------------------------|-------------|-------------|
|                    |           |             | 12.0-18.4                            | 18.5-24.9         | 25.0-29.9         | 30.0-60.0         | Per 5 units                            | $P_{trend}$ | $P_{smoke}$ |
| All Cancer*        | NEVER SMK | Events      | 41                                   | 674               | 448               | 178               |                                        |             |             |
|                    |           | HR (95% CI) | 0.88 (0.64, 1.21)                    | 1.00 (0.93, 1.08) | 1.07 (0.98, 1.18) | 1.28 (1.09, 1.49) | 1.11 (1.03, 1.19)                      | 0.007       | 0.53        |
|                    | SMOKER    | Events      | 74                                   | 932               | 602               | 170               |                                        |             |             |
|                    |           | HR (95% CI) | 1.11 (0.87, 1.41)                    | 1.00 (0.94, 1.07) | 1.09 (1.00, 1.18) | 1.13 (0.97, 1.33) | 1.08 (1.01, 1.15)                      | 0.08        |             |
| UADT               | NEVER SMK | Events      | 1                                    | 27                | 20                | 4                 |                                        |             |             |
|                    |           | HR (95% CI) | 0.52 (0.07, 3.80)                    | 1.00 (0.69, 1.45) | 1.17 (0.75, 1.83) | 0.89 (0.32, 2.43) | 1.10 (0.76, 1.59)                      | 0.91        | 0.009       |
|                    | SMOKER    | Events      | 7                                    | 89                | 28                | 7                 |                                        |             |             |
|                    |           | HR (95% CI) | 1.05 (0.48, 2.32)                    | 1.00 (0.81, 1.24) | 0.54 (0.37, 0.79) | 0.56 (0.26, 1.21) | 0.59 (0.43, 0.81)                      | 0.01        |             |
| Oesophagus         | NEVER SMK | Events      | 0                                    | 15                | 8                 | 3                 |                                        |             |             |
|                    |           | HR (95% CI) | -                                    | 1.00 (0.61, 1.65) | 0.82 (0.40, 1.65) | 1.05 (0.32, 3.40) | 1.09 (0.66, 1.80)                      | 0.88        | 0.39        |
|                    | SMOKER    | Events      | 5                                    | 39                | 17                | 4                 |                                        |             |             |
|                    |           | HR (95% CI) | 1.82 (0.70, 4.75)                    | 1.00 (0.73, 1.37) | 0.79 (0.48, 1.29) | 0.85 (0.30, 2.35) | 0.83 (0.55, 1.26)                      | 0.51        |             |
| Oropharynx, larynx | NEVER SMK | Events      | 1                                    | 12                | 12                | 1                 |                                        |             |             |
|                    |           | HR (95% CI) | 1.16 (0.16, 8.58)                    | 1.00 (0.57, 1.75) | 1.62 (0.91, 2.89) | 0.57 (0.08, 4.19) | 1.09 (0.63, 1.91)                      | 0.76        | 0.005       |
|                    | SMOKER    | Events      | 2                                    | 50                | 11                | 3                 |                                        |             |             |

| Cancer site | Smoking   | Body mass index (kg/m <sup>2</sup> ) |                   |                   |                   | Trend $\geq$ 18.5 (kg/m <sup>2</sup> ) |                           |                           |      |
|-------------|-----------|--------------------------------------|-------------------|-------------------|-------------------|----------------------------------------|---------------------------|---------------------------|------|
|             |           | 12.0-18.4                            | 18.5-24.9         | 25.0-29.9         | 30.0-60.0         | Per 5 units                            | <i>P</i> <sub>trend</sub> | <i>P</i> <sub>smoke</sub> |      |
| Lung**      |           | HR (95% CI)                          | 0.51 (0.12, 2.15) | 1.00 (0.75, 1.34) | 0.36 (0.20, 0.65) | 0.37 (0.11, 1.18)                      | 0.41 (0.26, 0.66)         | 0.005                     |      |
|             | NEVER SMK | Events                               | 14                | 78                | 20                | 11                                     |                           |                           |      |
|             |           | HR (95% CI)                          | 2.04 (1.18, 3.53) | 1.00 (0.80, 1.25) | 0.42 (0.27, 0.65) | 0.71 (0.39, 1.31)                      | 0.78 (0.60, 1.02)         | 0.01                      | 0.83 |
|             | SMOKER    | Events                               | 36                | 397               | 156               | 50                                     |                           |                           |      |
|             |           | HR (95% CI)                          | 0.85 (0.60, 1.21) | 1.00 (0.91, 1.10) | 0.67 (0.57, 0.79) | 0.78 (0.58, 1.05)                      | 0.81 (0.71, 0.92)         | 0.004                     |      |

\*All cancers after excluding lung and upper aero-digestive tract cancers. \*\*HR with 95% CI presented in Figure 2.

**Webtable 2: Baseline summary statistics and details of the 39 cohorts included in the analyses of body mass index and site-specific cancer mortality in the Asia Pacific Cohort Studies Collaboration (APCSC)\***

| Country     | Study                       | Baseline         | No. of subjects | No. of cancer deaths | Follow-up (yrs) Median | Female (%) | Age (yrs)   |                 | Body mass index (kg/m <sup>2</sup> ) |            |             |            | Smokers   |           |
|-------------|-----------------------------|------------------|-----------------|----------------------|------------------------|------------|-------------|-----------------|--------------------------------------|------------|-------------|------------|-----------|-----------|
|             |                             |                  |                 |                      |                        |            | Mean        | Range           | Mean                                 | SD         | Mean        | SD         | Males %   | Females % |
| Australia   | Busselton                   | 1966-1981        | 7423            | 689                  | 26.5                   | 52         | 44.7        | 20 - 96         | 24.9                                 | 3.2        | 24.4        | 4.2        | 45        | 24        |
| Australia   | Longitudinal Study of Aging | 1992-1993        | 1505            | 66                   | 5.1                    | 48         | 78.0        | 65 - 104        | 25.8                                 | 3.5        | 26.2        | 4.5        | 7         | 7         |
| Australia   | Melbourne                   | 1990-1994        | 41264           | 1112                 | 8.5                    | 59         | 54.8        | 27 - 75         | 27.2                                 | 3.6        | 26.7        | 4.9        | 15        | 9         |
| Australia   | National Heart Foundation   | 1989-1990        | 9257            | 154                  | 8.3                    | 51         | 43.4        | 20 - 70         | 25.9                                 | 3.6        | 24.9        | 4.8        | 27        | 21        |
| Australia   | Newcastle                   | 1983-1994        | 5926            | 215                  | 8.9                    | 50         | 51.7        | 21 - 77         | 27.1                                 | 3.8        | 26.3        | 5.1        | 28        | 18        |
| Australia   | Perth                       | 1978-1994        | 10225           | 311                  | 14.4                   | 48         | 45.1        | 20 - 90         | 25.7                                 | 3.4        | 24.7        | 4.4        | 30        | 21        |
| Australia   | WA AAA Screenees            | 1996-1999        | 12193           | 400                  | 3.2                    | 0          | 72.2        | 65 - 84         | 26.9                                 | 3.7        | -           | -          | 11        | -         |
| New Zealand | Fletcher Challenge          | 1992-1994        | 10339           | 134                  | 5.8                    | 28         | 44.3        | 20 - 89         | 26.9                                 | 4.0        | 25.2        | 4.5        | 26        | 18        |
| <b>ANZ</b>  | <b>Subtotal</b>             | <b>1966-1999</b> | <b>98132</b>    | <b>3081</b>          | <b>8.3</b>             | <b>45</b>  | <b>53.2</b> | <b>20 - 104</b> | <b>26.6</b>                          | <b>3.7</b> | <b>26.0</b> | <b>4.9</b> | <b>20</b> | <b>14</b> |
| China       | Anzhen                      | 1991             | 8373            | 66                   | 4.3                    | 55         | 53.8        | 35 - 92         | 23.6                                 | 3.3        | 24.1        | 4.0        | 51        | 10        |
| China       | Beijing Aging               | 1992             | 2084            | 48                   | 4.8                    | 51         | 69.8        | 55 - 93         | 22.8                                 | 3.7        | 23.7        | 4.2        | 46        | 14        |

|           |                              |           |       |     |      |    |      |          |      |     |      |     |    |    |
|-----------|------------------------------|-----------|-------|-----|------|----|------|----------|------|-----|------|-----|----|----|
| China     | CISCH                        | 1992-1993 | 2165  | 3   | 3.3  | 51 | 44.2 | 34 - 64  | 24.8 | 3.1 | 24.5 | 3.8 | 55 | 1  |
| China     | Capital Iron & Steel Company | 1974-1980 | 5031  | 104 | 12.5 | 0  | 45.3 | 20 - 74  | 23.2 | 2.7 | -    | -   | 74 | -  |
| China     | East Beijing                 | 1977-1994 | 1083  | 15  | 17.1 | 52 | 43.2 | 20 - 84  | 23.5 | 3.0 | 23.7 | 3.5 | 49 | 11 |
| China     | Fangshan                     | 1991-1992 | 2607  | 8   | 3.6  | 67 | 47.3 | 34 - 86  | 23.7 | 3.2 | 24.8 | 3.7 | 74 | 21 |
| China     | Guangzhou Occupational       | 1985-1997 | 20543 | 127 | 7.5  | 32 | 42.4 | 29 - 87  | 22.4 | 2.8 | 22.9 | 3.3 | 70 | 1  |
| China     | Huashan                      | 1991-1992 | 1640  | 4   | 2.9  | 54 | 52.7 | 35 - 75  | 23.0 | 3.2 | 23.6 | 3.6 | 49 | 4  |
| China     | Seven Cities Cohorts         | 1987      | 10760 | 175 | 2.7  | 54 | 53.8 | 35 - 96  | 22.3 | 3.3 | 22.9 | 3.9 | 57 | 17 |
| China     | Six Cohorts                  | 1982-1986 | 19363 | 380 | 9.0  | 47 | 44.7 | 35 - 59  | 21.1 | 2.3 | 21.3 | 2.9 | 76 | 12 |
| China     | Tianjin                      | 1984      | 9268  | 296 | 6.1  | 51 | 54.5 | 35 - 98  | 23.3 | 3.6 | 23.7 | 4.3 | 63 | 39 |
| China     | Yunnan                       | 1992      | 6580  | 239 | 4.5  | 3  | 55.8 | 35 - 84  | 21.5 | 2.9 | 23.7 | 3.0 | 70 | 0  |
| Hong Kong | Hong Kong                    | 1985-1991 | 2806  | 124 | 2.5  | 57 | 78.4 | 66 - 107 | 21.5 | 3.5 | 22.2 | 4.1 | 30 | 11 |
| Taiwan    | CVDFACTS                     | 1988-1996 | 5714  | 65  | 6.0  | 55 | 47.2 | 20 - 92  | 23.6 | 3.2 | 23.4 | 3.5 | 48 | 1  |
| Taiwan    | Kinmen                       | 1993-1995 | 1191  | 30  | 2.9  | 47 | 62.8 | 50 - 93  | 22.9 | 2.9 | 24.1 | 3.7 | 52 | 6  |
| Japan     | Aito Town                    | 1980-1983 | 1711  | 62  | 15.2 | 57 | 51.0 | 21 - 77  | 22.3 | 2.7 | 22.9 | 3.2 | 66 | 2  |

|             |                          |                       |               |             |            |           |             |                     |             |            |             |            |           |          |
|-------------|--------------------------|-----------------------|---------------|-------------|------------|-----------|-------------|---------------------|-------------|------------|-------------|------------|-----------|----------|
| Japan       | Akabane                  | 1985-<br>1986         | 1824          | 55          | 11.0       | 56        | 54.5        | 40 - 69             | 22.2        | 2.7        | 22.7        | 3.2        | 62        | 1        |
| Japan       | Civil Service<br>Workers | 1990-<br>1992         | 9315          | 61          | 6.7        | 33        | 46.7        | 40 - 55             | 22.6        | 2.7        | 22.2        | 2.8        | 51        | 11       |
| Japan       | Hisayama                 | 1961                  | 1507          | 189         | 24.6       | 56        | 55.9        | 40 - 91             | 21.5        | 2.3        | 21.7        | 2.9        | 77        | 17       |
| Japan       | Konan                    | 1987-<br>1995         | 1194          | 25          | 6.4        | 55        | 51.8        | 20 - 96             | 21.9        | 2.9        | 21.9        | 3.1        | 62        | 5        |
| Japan       | Miyama                   | 1988-<br>1990         | 1033          | 35          | 6.6        | 55        | 60.4        | 40 - 80             | 21.8        | 2.7        | 22.4        | 3.2        | 58        | 7        |
| Japan       | Ohasama                  | 1992-<br>1993         | 2196          | 30          | 4.1        | 63        | 59.3        | 27 - 91             | 22.9        | 2.9        | 23.5        | 3.3        | 51        | 2        |
| Japan       | Saitama                  | 1986-<br>1990         | 3600          | 145         | 11.0       | 62        | 54.5        | 20 - 94             | 22.2        | 2.8        | 22.5        | 3.0        | 63        | 8        |
| Japan       | Shibata                  | 1977                  | 2328          | 207         | 20.0       | 58        | 56.7        | 40 - 89             | 22.0        | 2.6        | 22.8        | 3.3        | 72        | 4        |
| Japan       | Shigaraki Town           | 1991-<br>1997         | 3737          | 55          | 4.4        | 59        | 57.1        | 29 - 95             | 22.2        | 2.9        | 22.7        | 3.2        | 59        | 8        |
| Japan       | Shirakawa                | 1974-<br>1979         | 4639          | 164         | 17.5       | 54        | 48.0        | 20 - 67             | 21.3        | 2.6        | 21.6        | 2.9        | 70        | 5        |
| Japan       | Tanno/Soubetsu           | 1977                  | 1976          | 86          | 16.4       | 53        | 51.1        | 39 - 65             | 23.0        | 2.7        | 24.2        | 3.4        | 71        | 10       |
| S. Korea    | KMIC                     | 1992                  | 183376        | 1232        | 4.0        | 37        | 44.1        | 35 - 59             | 23.4        | 2.4        | 22.3        | 2.5        | 58        | 0        |
| Singapore   | Singapore Heart          | 1982-<br>1997         | 2312          | 35          | 14.6       | 49        | 40.6        | 20 - 89             | 23.1        | 3.8        | 24.0        | 4.8        | 40        | 3        |
| Singapore   | Singapore NHS92          | 1992                  | 3303          | 22          | 6.2        | 52        | 39.2        | 20 - 70             | 23.3        | 3.8        | 23.2        | 4.5        | 35        | 3        |
| Thailand    | EGAT                     | 1985                  | 3128          | 43          | 11.4       | 23        | 42.6        | 35 - 54             | 23.2        | 3.1        | 22.8        | 3.2        | 54        | 6        |
| <b>Asia</b> | <b>Subtotal</b>          | <b>1961-<br/>1997</b> | <b>326387</b> | <b>4130</b> | <b>4.0</b> | <b>40</b> | <b>46.6</b> | <b>20 -<br/>107</b> | <b>23.0</b> | <b>2.7</b> | <b>22.6</b> | <b>3.1</b> | <b>60</b> | <b>6</b> |

|                |              |                       |               |             |            |           |             |                     |             |            |             |            |           |          |
|----------------|--------------|-----------------------|---------------|-------------|------------|-----------|-------------|---------------------|-------------|------------|-------------|------------|-----------|----------|
| <b>Overall</b> | <b>Total</b> | <b>1961-<br/>1999</b> | <b>424519</b> | <b>7211</b> | <b>4.0</b> | <b>41</b> | <b>48.1</b> | <b>20 -<br/>107</b> | <b>23.8</b> | <b>3.3</b> | <b>23.4</b> | <b>3.9</b> | <b>51</b> | <b>8</b> |
|----------------|--------------|-----------------------|---------------|-------------|------------|-----------|-------------|---------------------|-------------|------------|-------------|------------|-----------|----------|

---

\*Hyphened cells denote that no data were available. Abbreviations: ANZ, Australia and New Zealand; SD, standard deviation.

Study abbreviations: WA AAA Sreenees, Western Australian Abdominal Aortic Aneurysm Screening Program; CISCH, Capital Iron and Steel Company Hospital Cohort; CVDFACTS, Cardiovascular Disease Risk Factors Two-Township Study; KMIC, Korean Medical Insurance Company; Singapore NHS92, Singapore National Health Survey 1992; EGAT, Electricity Generating Authority of Thailand

**Webtable 3: Age and smoking-adjusted HRs for cancer mortality according to BMI, with no left censoring of data (n = 424 519)\***

|                          | BMI (kg/m <sup>2</sup> ) |                  |                  |                  | Trend ≥18.5 (kg/m <sup>2</sup> ) |                    |
|--------------------------|--------------------------|------------------|------------------|------------------|----------------------------------|--------------------|
|                          | 12.0–18.4                | 18.5–24.9        | 25.0–29.9        | 30.0–60.0        | Per 5 units                      |                    |
| Cancer site              | HR (95% CI)              | HR (95% CI)      | HR (95% CI)      | HR (95% CI)      | HR (95% CI)                      | P <sub>trend</sub> |
| All cancer               | 1.25 (1.13–1.38)         | 1.00 (0.97–1.03) | 0.94 (0.90–0.98) | 1.03 (0.95–1.12) | 1.00 (0.97–1.04)                 | 0.62               |
| All cancer†              | 1.18 (1.04–1.33)         | 1.00 (0.96–1.04) | 1.01 (0.96–1.06) | 1.12 (1.02–1.23) | 1.05 (1.01–1.10)                 | 0.09               |
| UADT                     | 1.52 (1.08–2.15)         | 1.00 (0.87–1.14) | 0.83 (0.68–1.03) | 0.67 (0.41–1.10) | 0.82 (0.68–0.99)                 | 0.09               |
| Oesophagus               | 1.39 (0.89–2.16)         | 1.00 (0.84–1.20) | 1.05 (0.80–1.37) | 0.93 (0.51–1.69) | 1.00 (0.80–1.25)                 | 0.99               |
| Oropharynx–larynx        | 1.79 (1.03–3.12)         | 1.00 (0.82–1.23) | 0.61 (0.43–0.86) | 0.39 (0.16–0.97) | 0.60 (0.44–0.82)                 | 0.009              |
| Stomach                  | 1.31 (1.02–1.67)         | 1.00 (0.91–1.09) | 0.89 (0.77–1.03) | 0.99 (0.69–1.44) | 0.98 (0.86–1.11)                 | 0.41               |
| Large intestine          | 0.78 (0.48–1.27)         | 1.00 (0.90–1.12) | 1.20 (1.05–1.37) | 1.48 (1.20–1.83) | 1.13 (1.02–1.25)                 | 0.001              |
| Colon                    | 0.67 (0.33–1.39)         | 1.00 (0.87–1.15) | 1.13 (0.96–1.33) | 1.45 (1.13–1.86) | 1.14 (1.01–1.29)                 | 0.02               |
| Rectum                   | 0.93 (0.48–1.79)         | 1.00 (0.83–1.20) | 1.28 (1.03–1.60) | 1.44 (0.96–2.16) | 1.07 (0.89–1.29)                 | 0.07               |
| Liver                    | 1.23 (0.93–1.64)         | 1.00 (0.91–1.10) | 1.00 (0.86–1.17) | 1.07 (0.69–1.66) | 1.07 (0.94–1.22)                 | 0.79               |
| Pancreas                 | 0.71 (0.38–1.31)         | 1.00 (0.86–1.16) | 0.93 (0.75–1.15) | 0.75 (0.48–1.18) | 0.93 (0.78–1.11)                 | 0.24               |
| Lung                     | 1.30 (1.08–1.56)         | 1.00 (0.94–1.07) | 0.72 (0.64–0.80) | 0.81 (0.66–1.00) | 0.87 (0.79–0.94)                 | 0.0005             |
| Skin, melanoma           | 1.91 (0.45–8.05)         | 1.00 (0.75–1.33) | 0.58 (0.40–0.85) | 0.75 (0.44–1.30) | 0.95 (0.71–1.27)                 | 0.15               |
| Breast, female <60 years | 0.19 (0.03–1.34)         | 1.00 (0.83–1.20) | 1.26 (0.89–1.79) | 1.11 (0.59–2.09) | 1.18 (1.03–1.35)                 | 0.33               |
| Breast, female ≥60 years | 1.29 (0.63–2.64)         | 1.00 (0.83–1.20) | 1.21 (0.95–1.53) | 1.53 (1.10–2.13) | 1.21 (1.06–1.36)                 | 0.02               |

|                          | BMI (kg/m <sup>2</sup> ) |                  |                  |                  | Trend ≥18.5 (kg/m <sup>2</sup> ) |                    |
|--------------------------|--------------------------|------------------|------------------|------------------|----------------------------------|--------------------|
|                          | 12.0–18.4                | 18.5–24.9        | 25.0–29.9        | 30.0–60.0        | Per 5 units                      |                    |
| Cancer site              | HR (95% CI)              | HR (95% CI)      | HR (95% CI)      | HR (95% CI)      | HR (95% CI)                      | P <sub>trend</sub> |
| Female genital organs    | 1.63 (0.96–2.75)         | 1.00 (0.82–1.23) | 1.21 (0.92–1.59) | 2.32 (1.61–3.34) | 1.32 (1.12–1.56)                 | 0.0008             |
| Ovaries                  | 0.86 (0.27–2.75)         | 1.00 (0.75–1.33) | 1.24 (0.86–1.78) | 2.14 (1.33–3.47) | 1.28 (1.03–1.59)                 | 0.01               |
| Uterus                   | 1.21 (0.29–5.15)         | 1.00 (0.63–1.57) | 1.07 (0.58–1.99) | 1.77 (0.74–4.23) | 1.38 (0.95–1.99)                 | 0.33               |
| Cervix                   | 2.55 (1.33–4.89)         | 1.00 (0.68–1.47) | 1.30 (0.74–2.27) | 3.64 (1.75–7.56) | 1.42 (1.01–2.00)                 | 0.02               |
| Prostate                 | 1.39 (0.65–2.97)         | 1.00 (0.83–1.20) | 1.51 (1.26–1.82) | 1.49 (1.05–2.11) | 1.22 (1.03–1.45)                 | 0.01               |
| Bladder                  | 1.48 (0.75–2.92)         | 1.00 (0.79–1.27) | 1.06 (0.77–1.46) | 0.53 (0.23–1.20) | 1.00 (0.76–1.33)                 | 0.46               |
| Kidney                   | 0.77 (0.18–3.22)         | 1.00 (0.74–1.34) | 1.21 (0.86–1.72) | 1.67 (0.94–2.96) | 1.23 (0.93–1.63)                 | 0.14               |
| Brain and nervous system | 1.19 (0.54–2.59)         | 1.00 (0.82–1.21) | 0.96 (0.75–1.24) | 0.89 (0.55–1.45) | 0.93 (0.75–1.15)                 | 0.67               |
| Haematological cancers   | 1.42 (0.88–2.31)         | 1.00 (0.88–1.14) | 1.13 (0.96–1.32) | 1.19 (0.90–1.57) | 1.11 (0.98–1.27)                 | 0.16               |
| Lymphoma                 | 1.85 (0.99–3.46)         | 1.00 (0.82–1.22) | 1.17 (0.92–1.47) | 0.84 (0.52–1.36) | 0.99 (0.81–1.21)                 | 0.97               |
| Myeloma                  | 1.64 (0.48–5.56)         | 1.00 (0.72–1.39) | 0.98 (0.64–1.49) | 1.14 (0.58–2.21) | 1.06 (0.76–1.47)                 | 0.76               |
| Leukaemia                | 0.82 (0.29–2.26)         | 1.00 (0.81–1.23) | 1.14 (0.89–1.47) | 1.65 (1.10–2.47) | 1.27 (1.05–1.54)                 | 0.047              |

Models stratified by study and sex. BMI=body-mass index. UADT=upper aerodigestive tract. \*For number of events in each BMI category see webtable 4. †All cancers after excluding lung and UADT.

**Webtable 4: Site-specific number of cancer deaths in the study sample by body mass index category before ( $n = 424\ 519$ ) and after left censoring at 3 years ( $n = 401\ 215$ ) in the Asia Pacific Cohort Studies Collaboration**

| Cancer site         | Left cens. | Body mass index (kg/m <sup>2</sup> ) |           |           |           |       |
|---------------------|------------|--------------------------------------|-----------|-----------|-----------|-------|
|                     | years      | 12.0-18.4                            | 18.5-22.9 | 23.0-24.9 | 25.0-29.9 | 30-60 |
| All Cancer          | 0          | 476                                  | 2656      | 1441      | 2031      | 607   |
|                     | 3          | 276                                  | 1790      | 975       | 1388      | 443   |
| UADT                | 0          | 40                                   | 179       | 61        | 91        | 17    |
|                     | 3          | 20                                   | 125       | 42        | 54        | 12    |
| Oesophagus          | 0          | 24                                   | 100       | 36        | 57        | 12    |
|                     | 3          | 15                                   | 73        | 26        | 30        | 7     |
| Oropharynx & larynx | 0          | 16                                   | 79        | 25        | 34        | 5     |
|                     | 3          | 5                                    | 52        | 16        | 24        | 5     |
| Stomach             | 0          | 75                                   | 403       | 174       | 171       | 32    |
|                     | 3          | 47                                   | 264       | 108       | 120       | 22    |
| Large intestine     | 0          | 18                                   | 176       | 117       | 255       | 102   |
|                     | 3          | 11                                   | 134       | 85        | 194       | 79    |
| Colon               | 0          | 8                                    | 104       | 76        | 168       | 73    |
|                     | 3          | 5                                    | 82        | 58        | 128       | 57    |
| Rectum              | 0          | 8                                    | 104       | 76        | 168       | 73    |

| Cancer site           | Left cens. | Body mass index (kg/m <sup>2</sup> ) |           |           |           |       |
|-----------------------|------------|--------------------------------------|-----------|-----------|-----------|-------|
|                       | years      | 12.0-18.4                            | 18.5-22.9 | 23.0-24.9 | 25.0-29.9 | 30-60 |
|                       | 3          | 5                                    | 82        | 58        | 128       | 57    |
| Liver                 | 0          | 57                                   | 351       | 179       | 165       | 22    |
|                       | 3          | 33                                   | 205       | 97        | 94        | 14    |
| Pancreas              | 0          | 11                                   | 114       | 65        | 90        | 21    |
|                       | 3          | 9                                    | 80        | 47        | 68        | 17    |
| Lung                  | 0          | 149                                  | 611       | 283       | 334       | 101   |
|                       | 3          | 72                                   | 383       | 178       | 193       | 64    |
| Skin, melanoma        | 0          | 2                                    | 15        | 27        | 30        | 14    |
|                       | 3          | 2                                    | 9         | 19        | 22        | 12    |
| Breast, female        | 0          | 9                                    | 104       | 63        | 98        | 50    |
|                       | 3          | 4                                    | 74        | 48        | 68        | 39    |
| Female genital organs | 0          | 16                                   | 60        | 35        | 51        | 36    |
|                       | 3          | 9                                    | 46        | 23        | 43        | 30    |
| Uterus                | 0          | 2                                    | 10        | 9         | 10        | 6     |
|                       | 3          | 2                                    | 7         | 6         | 9         | 3     |
| Cervix                | 0          | 11                                   | 19        | 9         | 12        | 9     |
|                       | 3          | 7                                    | 16        | 6         | 9         | 8     |

| Cancer site            | Left cens.<br>years | Body mass index (kg/m <sup>2</sup> ) |           |           |           |       |
|------------------------|---------------------|--------------------------------------|-----------|-----------|-----------|-------|
|                        |                     | 12.0-18.4                            | 18.5-22.9 | 23.0-24.9 | 25.0-29.9 | 30-60 |
| Ovaries                | 0                   | 3                                    | 30        | 16        | 29        | 21    |
|                        | 3                   | 0                                    | 22        | 11        | 25        | 19    |
| Prostate               | 0                   | 8                                    | 49        | 41        | 143       | 37    |
|                        | 3                   | 5                                    | 40        | 34        | 105       | 27    |
| Bladder                | 0                   | 11                                   | 30        | 30        | 43        | 6     |
|                        | 3                   | 5                                    | 18        | 20        | 29        | 5     |
| Kidney                 | 0                   | 2                                    | 31        | 11        | 35        | 14    |
|                        | 3                   | 2                                    | 19        | 10        | 27        | 9     |
| Brain & nervous system | 0                   | 7                                    | 58        | 42        | 66        | 18    |
|                        | 3                   | 6                                    | 44        | 31        | 46        | 14    |
| Hematologic cancers    | 0                   | 19                                   | 116       | 89        | 172       | 58    |
|                        | 3                   | 11                                   | 79        | 60        | 119       | 43    |
| Lymphoma               | 0                   | 12                                   | 52        | 38        | 80        | 19    |
|                        | 3                   | 5                                    | 32        | 22        | 53        | 13    |
| Myeloma                | 0                   | 3                                    | 12        | 19        | 25        | 10    |
|                        | 3                   | 3                                    | 11        | 16        | 19        | 9     |
| Leukaemia              | 0                   | 4                                    | 52        | 32        | 67        | 29    |

| Cancer site | Left cens. | Body mass index (kg/m <sup>2</sup> ) |           |           |           |       |
|-------------|------------|--------------------------------------|-----------|-----------|-----------|-------|
|             | years      | 12.0-18.4                            | 18.5-22.9 | 23.0-24.9 | 25.0-29.9 | 30-60 |
|             | 3          | 3                                    | 36        | 22        | 47        | 21    |

**Webtable 5: Site-specific number of cancer deaths in the study sample by region and body mass index category after left censoring at 3 years ( $n = 401\ 215$ ) in the Asia Pacific Cohort Studies Collaboration**

| Cancer site        | Region* | Body mass index (kg/m <sup>2</sup> ) |           |           |           |       |
|--------------------|---------|--------------------------------------|-----------|-----------|-----------|-------|
|                    |         | 12.0-18.4                            | 18.5-22.9 | 23.0-24.9 | 25.0-29.9 | 30-60 |
| All Cancer         | ANZ     | 23                                   | 433       | 448       | 946       | 395   |
|                    | Asia    | 253                                  | 1357      | 527       | 442       | 48    |
| UADT               | ANZ     | 0                                    | 25        | 18        | 31        | 10    |
|                    | Asia    | 20                                   | 100       | 24        | 23        | 2     |
| Oesophagus         | ANZ     | 0                                    | 8         | 13        | 17        | 6     |
|                    | Asia    | 15                                   | 65        | 13        | 13        | 1     |
| Oropharynx, larynx | ANZ     | 0                                    | 17        | 5         | 14        | 4     |
|                    | Asia    | 5                                    | 35        | 11        | 10        | 1     |
| Stomach            | ANZ     | 2                                    | 12        | 26        | 42        | 16    |
|                    | Asia    | 45                                   | 252       | 82        | 78        | 6     |
| Large intestine    | ANZ     | 2                                    | 62        | 54        | 163       | 73    |
|                    | Asia    | 9                                    | 72        | 31        | 31        | 6     |
| Liver              | ANZ     | 0                                    | 8         | 6         | 19        | 6     |
|                    | Asia    | 33                                   | 197       | 91        | 75        | 8     |
| Pancreas           | ANZ     | 0                                    | 14        | 26        | 52        | 15    |

| Cancer site            | Region * | Body mass index (kg/m <sup>2</sup> ) |           |           |           |       |
|------------------------|----------|--------------------------------------|-----------|-----------|-----------|-------|
|                        |          | 12.0-18.4                            | 18.5-22.9 | 23.0-24.9 | 25.0-29.9 | 30-60 |
| Lung                   | Asia     | 9                                    | 66        | 21        | 16        | 2     |
|                        | ANZ      | 7                                    | 94        | 88        | 130       | 57    |
| Skin, melanoma         | Asia     | 65                                   | 289       | 90        | 63        | 7     |
|                        | ANZ      | 1                                    | 9         | 19        | 20        | 12    |
| Breast, female         | Asia     | 1                                    | 0         | 0         | 2         | 0     |
|                        | ANZ      | 3                                    | 42        | 35        | 57        | 37    |
| Female genital organs  | Asia     | 1                                    | 32        | 13        | 11        | 2     |
|                        | ANZ      | 0                                    | 15        | 12        | 31        | 27    |
| Prostate               | Asia     | 9                                    | 31        | 11        | 12        | 3     |
|                        | ANZ      | 1                                    | 28        | 27        | 101       | 26    |
| Bladder                | Asia     | 4                                    | 12        | 7         | 4         | 1     |
|                        | ANZ      | 2                                    | 8         | 14        | 23        | 5     |
| Kidney                 | Asia     | 3                                    | 10        | 6         | 6         | 0     |
|                        | ANZ      | 0                                    | 8         | 7         | 23        | 7     |
| Brain & nervous system | Asia     | 2                                    | 11        | 3         | 4         | 2     |
|                        | ANZ      | 1                                    | 13        | 22        | 34        | 14    |
|                        | Asia     | 5                                    | 31        | 9         | 12        | 0     |

| Cancer site         | Region * | Body mass index (kg/m <sup>2</sup> ) |           |           |           |       |
|---------------------|----------|--------------------------------------|-----------|-----------|-----------|-------|
|                     |          | 12.0-18.4                            | 18.5-22.9 | 23.0-24.9 | 25.0-29.9 | 30-60 |
| Hematologic cancers | ANZ      | 3                                    | 37        | 33        | 102       | 40    |
|                     | Asia     | 8                                    | 42        | 27        | 17        | 3     |
| Lymphoma            | ANZ      | 2                                    | 15        | 12        | 44        | 12    |
|                     | Asia     | 3                                    | 17        | 10        | 9         | 1     |
| Myeloma             | ANZ      | 1                                    | 6         | 12        | 16        | 8     |
|                     | Asia     | 2                                    | 5         | 4         | 3         | 1     |
| Leukaemia           | ANZ      | 0                                    | 16        | 9         | 42        | 20    |
|                     | Asia     | 3                                    | 20        | 13        | 5         | 1     |

\*ANZ = Australia and New Zealand (n = 91 952); Asia = mainland China, Hong Kong, Taiwan, Japan, South Korea, Singapore, and Thailand (n = 309 263)

**Webtable 6: Sex-specific age and smoking adjusted hazard ratios (HR) with 95% confidence intervals (CI) for cancer mortality according to body mass index after left censoring at 3 years ( $n = 401\ 215$ ) in the Asia Pacific Cohort Studies Collaboration. Models stratified by study and sex.**

| Cancer site          | Sex   | Body mass index (kg/m <sup>2</sup> ) |              |           |                |           |                | Trend > 18.5 (kg/m <sup>2</sup> ) |             |              |                     |             |
|----------------------|-------|--------------------------------------|--------------|-----------|----------------|-----------|----------------|-----------------------------------|-------------|--------------|---------------------|-------------|
|                      |       | 18.5-24.9                            |              | 25.0-29.9 |                | 30.0-60.0 |                | < 25 vs. ≥ 25                     | Per 5 units |              |                     |             |
|                      |       | HR                                   | 95% CI       | HR        | 95% CI         | HR        | 95% CI         |                                   | HR          | 95% CI       | $P_{sex}^{\dagger}$ | $P_{trend}$ |
| All Cancer           | Men   | 1.00                                 | (0.94, 1.07) | 0.96      | (0.91, 1.02)   | 1.05      | (0.92, 1.21)   | 0.41                              | 0.99        | (0.93, 1.05) | 0.04                | 0.99        |
|                      | Women | 1.00                                 | (0.92, 1.08) | 0.98      | (0.90, 1.07)   | 1.19      | (1.03, 1.36)   |                                   | 1.08        | (1.02, 1.15) |                     |             |
| All Cancer*          | Men   | 1.00                                 | (0.92, 1.08) | 1.09      | (1.02, 1.16)   | 1.18      | (1.01, 1.38)   | 0.78                              | 1.07        | (1.00, 1.15) | 0.57                | 0.03        |
|                      | Women | 1.00                                 | (0.92, 1.09) | 1.02      | (0.93, 1.12)   | 1.25      | (1.07, 1.45)   |                                   | 1.10        | (1.03, 1.18) |                     |             |
| Upper aero-digestive | Men   | 1.00                                 | (0.76, 1.31) | 0.70      | (0.53, 0.92)   | 0.64      | (0.32, 1.31)   | 0.58                              | 0.71        | (0.54, 0.94) | 0.26                | 0.07        |
|                      | Women | 1.00                                 | (0.65, 1.53) | 0.86      | (0.50, 1.48)   | 0.81      | (0.30, 2.22)** |                                   | 0.94        | (0.64, 1.38) |                     |             |
| Oesophagus           | Men   | 1.00                                 | (0.69, 1.45) | 0.76      | (0.51, 1.14)   | 0.80      | (0.29, 2.20)** | 0.78                              | 0.86        | (0.59, 1.25) | 0.89                | 0.38        |
|                      | Women | 1.00                                 | (0.60, 1.66) | 0.89      | (0.48, 1.66)   | 0.81      | (0.25, 2.60)** |                                   | 0.89        | (0.57, 1.41) |                     |             |
| Oropharynx, larynx   | Men   | 1.00                                 | (0.67, 1.49) | 0.64      | (0.43, 0.95)   | 0.53      | (0.19, 1.44)** | 0.73                              | 0.59        | (0.39, 0.88) | 0.16                | 0.09        |
|                      | Women | 1.00                                 | (0.46, 2.20) | 0.78      | (0.26, 2.32)** | 0.81      | (0.11, 6.06)** |                                   | 1.07        | (0.51, 2.22) |                     |             |
| Stomach              | Men   | 1.00                                 | (0.82, 1.22) | 0.95      | (0.78, 1.16)   | 1.07      | (0.63, 1.82)   | 0.25                              | 1.13        | (0.94, 1.36) | 0.64                | 0.92        |
|                      | Women | 1.00                                 | (0.77, 1.30) | 1.30      | (0.98, 1.73)   | 1.02      | (0.46, 2.22)   |                                   | 1.05        | (0.82, 1.35) |                     |             |
| Large intestine      | Men   | 1.00                                 | (0.79, 1.27) | 1.52      | (1.29, 1.78)   | 1.99      | (1.45, 2.73)   | 0.06                              | 1.21        | (1.01, 1.44) | 0.46                | 0.0003      |

| Cancer site    | Sex   | Body mass index (kg/m <sup>2</sup> ) |              |           |              |           |              | Trend > 18.5 (kg/m <sup>2</sup> ) |             |              |                                      |                           |      |
|----------------|-------|--------------------------------------|--------------|-----------|--------------|-----------|--------------|-----------------------------------|-------------|--------------|--------------------------------------|---------------------------|------|
|                |       | 18.5-24.9                            |              | 25.0-29.9 |              | 30.0-60.0 |              | < 25 vs. ≥ 25                     | Per 5 units |              |                                      |                           |      |
|                |       | HR                                   | 95% CI       | HR        | 95% CI       | HR        | 95% CI       |                                   | HR          | 95% CI       | <i>P</i> <sub>sex</sub> <sup>†</sup> | <i>P</i> <sub>trend</sub> |      |
| Colon          | Women | 1.00                                 | (0.81, 1.24) | 1.01      | (0.80, 1.27) | 1.28      | (0.91, 1.78) |                                   | 1.10        | (0.94, 1.29) |                                      | 0.31                      |      |
|                | Men   | 1.00                                 | (0.74, 1.34) | 1.28      | (1.04, 1.58) | 2.14      | (1.50, 3.06) | 0.21                              | 1.29        | (1.05, 1.60) | 0.14                                 | 0.002                     |      |
| Rectum         | Women | 1.00                                 | (0.78, 1.29) | 1.04      | (0.80, 1.35) | 1.08      | (0.72, 1.63) |                                   | 1.05        | (0.87, 1.26) |                                      | 0.73                      |      |
|                | Men   | 1.00                                 | (0.67, 1.49) | 1.88      | (1.47, 2.40) | 1.43      | (0.72, 2.82) | 0.18                              | 1.03        | (0.75, 1.41) | 0.41                                 | 0.07                      |      |
| Liver          | Women | 1.00                                 | (0.66, 1.51) | 0.85      | (0.52, 1.39) | 1.89      | (1.05, 3.38) |                                   | 1.23        | (0.92, 1.64) |                                      | 0.19                      |      |
|                | Men   | 1.00                                 | (0.84, 1.19) | 0.95      | (0.76, 1.18) | 1.33      | (0.72, 2.46) | 0.13                              | 1.06        | (0.87, 1.30) | 0.39                                 | 0.86                      |      |
| Pancreas       | Women | 1.00                                 | (0.67, 1.49) | 1.72      | (1.20, 2.48) | 0.76      | (0.24, 2.45) | **                                | 1.25        | (0.91, 1.72) |                                      | 0.39                      |      |
|                | Men   | 1.00                                 | (0.71, 1.40) | 0.92      | (0.69, 1.21) | 0.55      | (0.24, 1.25) | 0.23                              | 0.85        | (0.63, 1.16) | 0.12                                 | 0.26                      |      |
| Lung           | Women | -                                    | (0.70, 1.42) | 1.25      | (0.88, 1.78) | 1.32      | (0.71, 2.44) |                                   | 1.17        | (0.91, 1.51) |                                      | 0.34                      |      |
|                | Men   | 1.00                                 | (0.87, 1.15) | 0.66      | (0.56, 0.77) | 0.80      | (0.58, 1.11) | 0.31                              | 0.80        | (0.69, 0.92) | 0.09                                 | 0.003                     |      |
| Skin, melanoma | Women | 1.00                                 | (0.81, 1.23) | 0.78      | (0.60, 1.02) | 0.93      | (0.62, 1.41) |                                   | 0.97        | (0.81, 1.16) |                                      | 0.40                      |      |
|                | Men   | 1.00                                 | (0.61, 1.64) | 0.66      | (0.42, 1.03) | 0.59      | (0.24, 1.44) | **                                | 0.35        | (0.58, 1.44) | 0.19                                 | 0.21                      |      |
| Bladder        | Women | 1.00                                 | (0.50, 1.99) | 0.60      | (0.23, 1.60) | 2.10      | (0.98, 4.50) |                                   | 1.38        | (0.91, 2.08) |                                      | 0.25                      |      |
|                | Men   | 1.00                                 | (0.62, 1.62) | 1.46      | (1.04, 2.05) | 0.72      | (0.23, 2.27) | **                                | 0.10        | (0.69, 1.57) | 0.67                                 | 0.74                      |      |
| Kidney         | Women | 1.00                                 | (0.48, 2.09) | 0.32      | (0.08, 1.26) | **        | 0.70         | (0.17, 2.85)                      | **          | 1.22         | (0.67, 2.23)                         |                           | 0.37 |
|                | Men   | 1.00                                 | (0.56, 1.78) | 1.59      | (1.06, 2.39) | 2.56      | (1.17, 5.62) | 0.37                              | 1.51        | (1.01, 2.27) | 0.10                                 | 0.05                      |      |

| Cancer site            | Sex   | Body mass index (kg/m <sup>2</sup> ) |              |           |              |           |              | Trend > 18.5 (kg/m <sup>2</sup> )    |      |             |                                      |                           |      |
|------------------------|-------|--------------------------------------|--------------|-----------|--------------|-----------|--------------|--------------------------------------|------|-------------|--------------------------------------|---------------------------|------|
|                        |       | 18.5-24.9                            |              | 25.0-29.9 |              | 30.0-60.0 |              | < 25 vs. ≥ 25                        |      | Per 5 units |                                      |                           |      |
|                        |       | HR                                   | 95% CI       | HR        | 95% CI       | HR        | 95% CI       | <i>P</i> <sub>sex</sub> <sup>†</sup> | HR   | 95% CI      | <i>P</i> <sub>sex</sub> <sup>†</sup> | <i>P</i> <sub>trend</sub> |      |
| Brain & nervous system | Women | 1.00                                 | (0.49, 2.02) | 1.17      | (0.61, 2.27) | 0.63      | (0.15, 2.61) | **                                   |      | 0.85        | (0.48, 1.48)                         |                           | 0.74 |
|                        | Men   | 1.00                                 | (0.69, 1.45) | 0.94      | (0.69, 1.29) | 1.05      | (0.53, 2.07) |                                      | 0.97 | 0.90        | (0.64, 1.27)                         | 0.55                      | 0.98 |
| Hematologic cancers    | Women | 1.00                                 | (0.63, 1.58) | 0.95      | (0.57, 1.60) | 0.92      | (0.37, 2.26) | **                                   |      | 1.05        | (0.73, 1.52)                         |                           | 0.85 |
|                        | Men   | 1.00                                 | (0.75, 1.34) | 1.33      | (1.09, 1.63) | 1.49      | (0.97, 2.29) |                                      | 0.34 | 1.22        | (0.98, 1.51)                         | 0.51                      | 0.08 |
| Lymphoma               | Women | 1.00                                 | (0.74, 1.34) | 1.03      | (0.76, 1.39) | 1.13      | (0.72, 1.77) |                                      |      | 1.10        | (0.90, 1.35)                         |                           | 0.69 |
|                        | Men   | 1.00                                 | (0.62, 1.62) | 1.66      | (1.23, 2.25) | 1.02      | (0.44, 2.34) |                                      | 0.35 | 1.07        | (0.75, 1.52)                         | 0.99                      | 0.45 |
| Myeloma                | Women | 1.00                                 | (0.63, 1.58) | 1.08      | (0.69, 1.70) | 0.97      | (0.45, 2.09) |                                      |      | 1.07        | (0.77, 1.48)                         |                           | 0.97 |
|                        | Men   | 1.00                                 | (0.53, 1.90) | 1.05      | (0.64, 1.71) | 1.39      | (0.56, 3.45) | **                                   | 0.57 | 1.11        | (0.67, 1.86)                         | 0.76                      | 0.62 |
| Leukaemia              | Women | 1.00                                 | (0.52, 1.93) | 0.65      | (0.28, 1.55) | 1.06      | (0.39, 2.89) | **                                   |      | 0.99        | (0.60, 1.65)                         |                           | 0.89 |
|                        | Men   | 1.00                                 | (0.64, 1.56) | 1.20      | (0.87, 1.66) | 2.00      | (1.09, 3.66) |                                      | 0.84 | 1.42        | (1.03, 1.96)                         | 0.42                      | 0.10 |
|                        | Women | 1.00                                 | (0.62, 1.61) | 1.17      | (0.74, 1.85) | 1.33      | (0.67, 2.62) |                                      |      | 1.19        | (0.87, 1.62)                         |                           | 0.48 |

\*All cancers after excluding lung and upper aero-digestive tract cancers. \*\*HR based on ≤ 5 events. †P-value of interaction term.

**Webappendix: List of the Asia Pacific Cohort Studies Collaboration (APCSC) Executive Committee members and participating studies with principal collaborators  
APCSC Executive Committee**

M. Woodward (Chair), X. Fang, D.F. Gu, R. Huxley, Y. Imai, H.C. Kim, T.H. Lam, W.H. Pan, A. Rodgers, I. Suh, H. Ueshima

**Participating Studies and Principal Collaborators in APCSC**

Aito Town: A. Okayama, H. Ueshima, H. Maegawa; Akabane: M. Nakamura, N. Aoki; Anzhen02: Z.S. Wu; Anzhen: C.H. Yao, Z.S. Wu; Australian Longitudinal Study of Aging: Mary Luszcz; Australian National Heart Foundation: T.A. Welborn; Beijing Aging: Z. Tang; Beijing Steelworkers: L.S. Liu, J.X. Xie; Blood Donors' Health: R. Norton, S. Ameratunga, S. MacMahon, G. Whitlock; Busselton: M.W. Knuiman; Canberra-Queanbeyan: H. Christensen; Capital Iron and Steel Company: X.G. Wu; CISCH: J. Zhou, X.H. Yu; Civil Service Workers: A. Tamakoshi; CVDFACTS: W.H. Pan; East Beijing: Z.L. Wu, L.Q. Chen, G.L. Shan; Electricity Generating Authority of Thailand: P. Sritara; Fangshan: D.F. Gu, X.F. Duan; Fletcher Challenge: S. MacMahon, R. Norton, G. Whitlock, R. Jackson; Guangzhou: Y.H. Li; Guangzhou Occupational: T.H. Lam, C.Q. Jiang; Hisayama: Y. Kiyohara, H. Arima, M. Iida; Hong Kong: J. Woo, S.C. Ho; Huashan: Z. Hong, M.S. Huang, B. Zhou; Kinmen: J.L. Fuh; Konan: H. Ueshima, Y. Kita, S.R. Choudhury; KMIC: I. Suh, S.H. Jee, I.S. Kim; Melbourne: G.G. Giles; Miyama: T. Hashimoto, K. Sakata; Newcastle: A. Dobson; Ohasama: Y. Imai, T. Ohkubo, A. Hozawa; Perth: the late K. Jamrozik, M. Hobbs, R. Broadhurst; Saitama: K. Nakachi; Seven Cities: X.H. Fang, S.C. Li, Q.D. Yang; Shanghai Factory Workers: Z.M. Chen; Shibata: H. Tanaka; Shigaraki Town: Y. Kita, A. Nozaki, H. Ueshima; Shirakawa: H. Horibe, Y. Matsutani, M. Kagaya; Singapore Heart: K. Hughes, J. Lee; Singapore NHS92: D. Heng, S.K. Chew; Six Cohorts: B.F. Zhou, H.Y. Zhang; Tanno/Soubetsu: K. Shimamoto, S. Saitoh; Tianjin: Z.Z. Li, H.Y. Zhang; Western Australia AAA Screenees: P. Norman, the late K. Jamrozik; Xi'an: Y. He, T.H. Lam; Yunnan: S.X. Yao.
